# Supplementary material for: Distribution of deep-water scleractinian and stylasterid corals across abiotic environmental gradients on three seamounts in the Anegada Passage
Source: PeerJ. 2020 Jul 31;8:e9523. doi: 10.7717/peerj.9523 (PMC7397984; doi:10.7717/peerj.9523)
Supplement: Supplemental Information 2 — Values in bold denote water samples taken directly above or adjacent to scleractinian or stylasterid coral colonies (see Table 3). Other values were taken at the start of or along transects or during ROV ascent or descent. [file peerj-08-9523-s002.xlsx]

## Sheet: Sheet1
Supplementary Table 1: Water samples and environmental data used to determine model predicted values of ΩArag for coral occurrences. Values in bold denote water samples taken directly above or adjacent to scleractinian or stylasterid coral colonies (see Table 3). Other values were taken at the start of or along transects or during ROV ascent or descent.
Sample #	Seamount	Dive number	Latitude (DD)	Longitude (DD)	Pressure (db)	Depth (m)	Total Alkalinity (µmol·kg^-1)	pH in situ	Temperature (°C)	Oxygen (μmol/L)	Measured ΩArag	Salinity (PSU)	Model predicted ΩArag
NA052-001	Dog	H1372	18.3138	-63.7716	1043	1034	2305.29	7.925	5.52	212.7	1.19	34.95	1.1023
NA052-009	Dog	H1372	18.3265	-63.7741	832	826	2299.53	7.884	6.75	163.01	1.175	34.89	1.0811
NA052-010	Dog	H1372	18.3263	-63.773	302	300	2379.46	8.041	17.9	72.04	2.717	36.54	2.3769
NA052-011	Dog	H1372	18.3262	-63.7733	202	200	2396.38	8.054	20.19	212	3.069	36.83	3.1151
NA052-012	Dog	H1372	18.3257	-63.773	101	100	2398.76	8.109	24.94	234.05	3.982	36.9	3.7362
NA052-013	Dog	H1372	18.3254	-63.7728	51	50	2370.77	8.073	28.4723	255.17	4.133	36.47	4.1257
NA052-015	Dog	H1373	18.3774	-63.7695	832	826	2310.79	7.908	6.77	169.22	1.243	34.92	1.1076
NA052-022	Dog	H1373	18.3759	-63.768	784	778	2307.73	7.889	6.96	162.9	1.208	34.92	1.1102
NA052-031	Dog	H1373	18.366	-63.7665	403	400	2362.82	8.02	16.08	196.39	2.405	36.3	2.5027
NA052-032	Dog	H1373	18.3661	-63.7664	302	300	2355.27	8.047	17.5778	214.57	2.69	36.48	2.7613
NA052-033	Dog	H1373	18.366	-63.7662	151	150	2399.57	8.089	22.1913	219.67	3.517	37.12	3.4198
NA052-034	Dog	H1373	18.3659	-63.7663	51	50	2365.76	8.069	28.6057	248.81	4.119	36.58	4.1414
NA052-035	Dog	H1374	18.3409	-63.7274	629	624	2299.96	7.892	9.11	148.08	1.347	35.12	1.3465
NA052-044	Dog	H1374	18.3471	-63.7273	501	498	2327.72	7.912	11.68	156.3	1.599	35.49	1.7322
NA052-046	Dog	H1374	18.3514	-63.7302	440	436	2332.29	7.937	13.52	164.15	1.822	35.78	2.0185
NA052-049	Dog	H1374	18.3574	-63.7298	345	342	2375.77	8.031	17.82	215.95	2.645	36.52	2.8002
NA052-054	Dog	H1374	18.3608	-63.7274	280	278	2372.88	8.041	17.65	218.8	2.693	36.49	2.7842
NA052-058	Conrad	H1375	18.1759	-63.8854	908	900	2291.39	7.893	6.31	170	1.16	34.88	1.0503
NA052-068	Conrad	H1375	18.1789	-63.889	783	777	2293.32	7.873	6.5239	165.06	1.141	34.88	1.0597
NA052-070	Conrad	H1375	18.1795	-63.8891	700	694	2302.44	7.853	8.58	149.49	1.206	35.07	1.2814
NA052-075	Conrad	H1375	18.18	-63.8894	666	661	2300.04	7.862	8.667	149.55	1.238	35.07	1.2914
NA052-089	Conrad	H1375	18.1889	-63.8996	504	500	2332.74	7.905	12.45	156.03	1.628	35.63	1.8446
NA052-098	Conrad	H1376	18.2747	-63.8728	1310	1298	2321.54	7.917	4.78	238.75	1.108	34.97	1.1004
NA052-108	Conrad	H1376	18.2718	-63.8742	1228	1217	2320.01	7.936	4.6776	240.95	1.158	34.97	1.0963
NA052-121	Conrad	H1376	18.2635	-63.8803	987	978	2313.2	7.897	5.75	204.2	1.145	34.95	1.1027
NA052-125	Conrad	H1376	18.2538	-63.8844	801	795	2298.25	7.834	7.4878	154.71	1.093	34.95	1.151
NA052-126	Conrad	H1376	18.2519	-63.8853	709	703	2306.36	7.84	7.6831	153.89	1.132	34.97	1.1738
NA052-128	Conrad	H1376	18.2505	-63.8863	598	593	2311.88	7.861	10.6179	151.18	1.355	35.33	1.5661
NA052-137	Noroit	H1377	18.0913	-64.004	2195	2170	2307.77	7.934	4.07	276	0.989	34.57	1.0596
NA052-143	Noroit	H1377	18.099	-64.0106	1759	1741	2303.82	7.951	4.1566	270.06	1.082	34.58	1.0528
NA052-150	Noroit	H1377	18.1015	-64.0105	1540	1525	2314.73	7.957	4.268	258.01	1.133	34.56	1.0252
NA052-160	Noroit	H1377	18.1169	-64.0216	749	744	2300.84	7.848	7.31	154.81	1.118	34.52	1.0534
NA052-161	Noroit	H1377	18.1166	-64.0217	507	504	2326.02	7.898	11.8187	154.16	1.55	35.12	1.6736
NA052-162	Noroit	H1377	18.1165	-64.0215	103	103	2405.95	8.08	25.5766	259.44	3.866	36.49	3.8116
