# Supplementary material for: Distribution of deep-water scleractinian and stylasterid corals across abiotic environmental gradients on three seamounts in the Anegada Passage
Source: PeerJ. 2020 Jul 31;8:e9523. doi: 10.7717/peerj.9523 (PMC7397984; doi:10.7717/peerj.9523)
Supplement: Supplemental Information 5 — Each identification is presented as the accepted name according to the World Register of Marine Species (http://www.marinespecies.org) as of March 1, 2020. [file peerj-08-9523-s005.xlsx]

## Sheet: Sheet1
	Supplementary Table 4: Voucher collections used to identify scleractinian and stylasterid coral species collected during NA052. Each identification is presented as the accepted name according to the World Register of Marine Species (http://www.marinespecies.org) as of March 1, 2020.
	Sample ID	Seamount	Dive number	Depth (m)	Identification	Identifier
	NA052-029	Dog	H1373	707	Crypthelia sp. 1	S. Auscavitch
	NA052-051	Dog	H1374	312	Madracis myriaster	S. Auscavitch
	NA052-072	Conrad	H1375	662	Caryophyllia sp. 1	S. Auscavitch
	NA052-088	Conrad	H1375	500	Solenosmilia variabilis	S. Auscavitch
	NA052-090	Conrad	H1375	494	Solenosmilia variabilis	S. Auscavitch
	NA052-094	Conrad	H1375	274	Madracis myriaster	S. Auscavitch
	NA052-106	Conrad	H1376	1222	Javania cailleti	S. Cairns (NMNH)
	NA052-107	Conrad	H1376	1217	Madrepora oculata	S. Auscavitch
	NA052-110	Conrad	H1376	1204	Madrepora oculata	S. Auscavitch
	NA052-127	Conrad	H1376	594	Dendrophyllia alternata	S. Auscavitch
	NA052-149	Noroît	H1377	1525	Madrepora oculata	S. Auscavitch
	NA052-151	Noroît	H1377	1497	Madrepora oculata	S. Auscavitch
	NA052-170	Noroît	H1378	1020	Madrepora oculata	S. Auscavitch
