# Supplementary material for: Distribution of deep-water scleractinian and stylasterid corals across abiotic environmental gradients on three seamounts in the Anegada Passage
Source: PeerJ journal article supplement (doi:10.7717/peerj.9523), 2020-07-31

Supplementary Figure 1: Aragonite saturation state profiles for the Anegada Passage using measured (closed circle) and model predicted (open circle)  $\Omega_{\text{arag}}$  values (see Supplementary Table 1). A solid red vertical line at  $\Omega_{\text{arag}} = 1$  represents the aragonite saturation horizon.

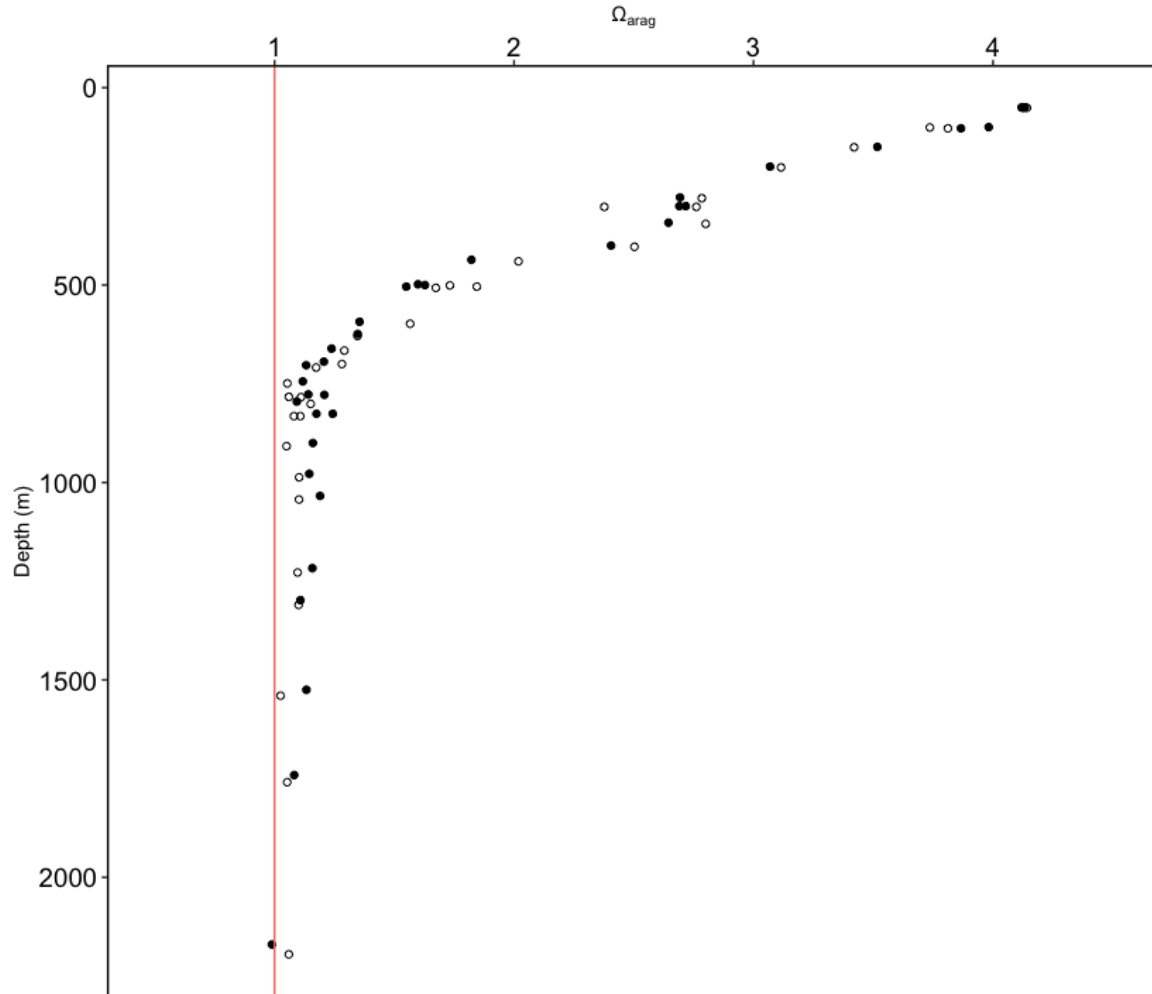

Supplement: Supplementary_Figure_1.pdf [file Supplementary_Figure_1.pdf]
